# Supplementary material for: Chemical signaling and insect attraction is a conserved trait in yeasts
Source: PubMed Central journal article supplement (PMC5838033; doi:10.1002/ece3.3905), 2018-02-14
Supplement: ECE3-8-2962-s001.pdf [file ECE3-8-2962-s001.pdf]

Appendix S1. Proteins in the reference *Saccharomyces cerevisiae* (S288C) and their corresponding orthologues in investigated yeasts

| <i>Yarrowia lipolytica</i> (CLIB122) |          |               |               | <i>Candida albicans</i> (WD-1) |          |               |               | <i>Debarya brucei</i> (AWRI 1499) |          |               |               | <i>Kluyveromyces lactis</i> (Y707) |          |               |               | <i>Candida glabrata</i> (Y475) |          |               |               | <i>Saccharomyces cerevisiae</i> (Y706) |             |                |                | <i>Saccharomyces cerevisiae</i> (S288C) |             |                |                |                |                |
|--------------------------------------|----------|---------------|---------------|--------------------------------|----------|---------------|---------------|-----------------------------------|----------|---------------|---------------|------------------------------------|----------|---------------|---------------|--------------------------------|----------|---------------|---------------|----------------------------------------|-------------|----------------|----------------|-----------------------------------------|-------------|----------------|----------------|----------------|----------------|
| Genebank ID                          | E value  | Identities    | Positives     | Genebank ID                    | E value  | Identities    | Positives     | Genebank ID                       | E value  | Identities    | Positives     | Genebank ID                        | E value  | Identities    | Positives     | Genebank ID                    | E value  | Identities    | Positives     | Genebank ID                            | E value     | Identities     | Positives      | Genebank ID                             | E value     | Identities     | Positives      | Protein        |                |
| -                                    | -        | -             | -             | -                              | -        | -             | -             | -                                 | -        | -             | -             | -                                  | -        | -             | -             | -                              | -        | -             | -             | -                                      | -           | -              | -              | -                                       | -           | -              | -              | -              |                |
| g 49650080                           | 3.4e-133 | 250/496 (50%) | 334/496 (67%) | g 238881848                    | 2.3e-143 | 262/497 (52%) | 352/497 (70%) | g 385304822                       | 5.1e-123 | 224/442 (50%) | 299/442 (67%) | g 49644898                         | 2.4e-84  | 171/522 (32%) | 298/522 (57%) | g 49524971                     | 3.2e-137 | 247/540 (45%) | 366/540 (67%) | g 392299430                            | 3.1e-297    | 535/535 (100%) | 535/535 (100%) | g 1392296702                            | 6.5e-297    | 535/535 (100%) | 535/535 (100%) | ATF1 (YOR177W) |                |
| g 49647333                           | 2.9e-51  | 132/448 (29%) | 221/448 (49%) | g 238881328                    | 7.1e-89  | 171/439 (38%) | 260/439 (59%) | g 385302174                       | 1.2e-52  | 132/362 (36%) | 195/362 (53%) | g 49644672                         | 4.6e-177 | 318/504 (63%) | 388/504 (76%) | g 49525724                     | 9E-197   | 355/508 (69%) | 419/508 (82%) | g 392299549                            | 4.3e-277    | 499/500 (99%)  | 500/500 (100%) | g 392299549                             | 4.3e-277    | 499/500 (99%)  | 500/500 (100%) | AROB (YGL202W) |                |
| g 49648423                           | 6.8e-128 | 243/495 (49%) | 331/495 (66%) | -                              | -        | -             | -             | -                                 | -        | -             | -             | g 49642693                         | 9.6e-161 | 292/506 (57%) | 381/506 (75%) | g 49525932                     | 9.6e-163 | 292/506 (57%) | 381/506 (75%) | g 392298944                            | 4.6e-280    | 513/513 (100%) | 513/513 (100%) | g 392298944                             | 4.6e-280    | 513/513 (100%) | 513/513 (100%) | AROB (YHR137W) |                |
| g 49647250                           | 1.5e-162 | 294/488 (60%) | 379/488 (77%) | -                              | -        | -             | -             | g 385302426                       | 4.6e-177 | 325/524 (62%) | 401/524 (76%) | g 49642640                         | 2.4e-189 | 340/501 (67%) | 412/501 (82%) | g 49525613                     | 1.9e-182 | 329/503 (65%) | 400/503 (79%) | -                                      | -           | -              | -              | -                                       | -           | -              | -              | ALD2 (YMR179C) |                |
| -                                    | -        | -             | -             | g 238882092                    | 7.8e-175 | 318/499 (63%) | 393/499 (78%) | -                                 | -        | -             | -             | g 49644235                         | 2E-222   | 395/512 (77%) | 457/512 (89%) | g 49525001                     | 1E-234   | 423/514 (82%) | 470/514 (91%) | g 392296700                            | 1.6e-279    | 519/519 (100%) | 519/519 (100%) | g 392296700                             | 1.6e-279    | 519/519 (100%) | 519/519 (100%) | ALD4 (YOR374W) |                |
| -                                    | -        | -             | -             | -                              | -        | -             | -             | g 49641679                        | 4E-226   | 398/502 (79%) | 449/502 (89%) | g 49641127                         | 3E-205   | 364/491 (74%) | 435/491 (88%) | g 49527155                     | 5.6e-230 | 400/513 (77%) | 449/513 (87%) | g 392299771                            | 2.8e-280    | 520/520 (100%) | 520/520 (100%) | g 392299771                             | 2.8e-280    | 520/520 (100%) | 520/520 (100%) | ALD5 (YHR073W) |                |
| -                                    | -        | -             | -             | -                              | -        | -             | -             | -                                 | -        | -             | -             | g 4964238                          | 1.3e-135 | 240/381 (62%) | 298/381 (78%) | g 49524727                     | 2.2e-129 | 231/383 (60%) | 291/383 (75%) | g 392301243                            | 2.7e-211    | 382/382 (100%) | 382/382 (100%) | g 392301243                             | 2.7e-211    | 382/382 (100%) | 382/382 (100%) | BDH1 (YAL060W) |                |
| g 49648146                           | 8.6e-137 | 247/390 (63%) | 300/390 (76%) | g 238879061                    | 2.9e-97  | 181/394 (45%) | 255/394 (64%) | g 385303323                       | 5.3e-105 | 199/378 (52%) | 264/378 (69%) | g 49644239                         | 2E-128   | 230/377 (61%) | 289/377 (76%) | g 49526328                     | 9.9e-207 | 361/495 (72%) | 434/495 (87%) | g 392301232                            | 3.8e-230    | 412/417 (98%)  | 412/417 (98%)  | g 392301232                             | 3.8e-230    | 412/417 (98%)  | 412/417 (98%)  | BDH2 (YAL061W) |                |
| -                                    | -        | -             | -             | g 238882204                    | 5.6e-133 | 248/371 (66%) | 287/371 (77%) | g 385302974                       | 2.3e-143 | 257/372 (69%) | 305/372 (81%) | g 49640582                         | 1.1e-173 | 315/383 (82%) | 337/383 (87%) | g 49525675                     | 4.9e-173 | 308/372 (82%) | 334/372 (89%) | g 392299022                            | 4.1e-217    | 393/393 (100%) | 393/393 (100%) | g 392299022                             | 4.1e-217    | 393/393 (100%) | 393/393 (100%) | BAT1 (YHR089W) |                |
| -                                    | -        | -             | -             | -                              | -        | -             | -             | -                                 | -        | -             | -             | -                                  | -        | -             | -             | -                              | -        | -             | -             | -                                      | -           | -              | -              | -                                       | -           | -              | -              | -              |                |
| -                                    | -        | -             | -             | -                              | -        | -             | -             | -                                 | -        | -             | -             | -                                  | -        | -             | -             | -                              | -        | -             | -             | -                                      | g 392298577 | 6.7e-208       | 376/376 (100%) | 376/376 (100%)                          | g 392298577 | 6.7e-208       | 376/376 (100%) | 376/376 (100%) | BAT2 (YJR148W) |

Orthologs are identified by their unique Genebank ID. The E value indicates the statistical significance of each alignment. The lower the E value, the more significant is the hit, and the less likely it is to have occurred by chance. Identities is the ratio (and percentage) of identical aminoacids and the subject length for each alignment. Positives is the ratio (and percentage) of conservative substitutions and the subject length for each alignment, as defined by the substitution matrix (BLOSUM62).
